# Supplementary material for: SMAP-HydroBlocks, a 30-m satellite-based soil moisture dataset for the conterminous US
Source: PubMed Central journal article supplement (PMC8505542; doi:10.1038/s41597-021-01050-2), 2021-10-11
Supplement: 41597_2021_1050_MOESM1_ESM.pdf [file 41597_2021_1050_MOESM1_ESM.pdf]

# Supplemental material for SMAP-HydroBlocks, a satellite-based soil moisture dataset at 30-m resolution over the United State

Noemi Vergopolan<sup>1,\*</sup>, Nathaniel W. Chaney<sup>2</sup>, Ming Pan<sup>1,3</sup>, Justin Sheffield<sup>4</sup>, Hylke E. Beck<sup>5</sup>, Craig R. Ferguson<sup>6</sup>, Laura Torres-Rojas<sup>2</sup>, Sara Sadri<sup>7</sup>, and Eric F. Wood<sup>1</sup>

<sup>1</sup>Princeton University, Department of Civil and Environmental Engineering, Princeton, NJ, United States

<sup>2</sup>Duke University, Department of Civil and Environmental Engineering, Durham, NC, United States

<sup>3</sup>Center for Western Weather and Water Extremes, Scripps Institution of Oceanography, University of California, CA, United States

<sup>4</sup>Southampton University, School of Geography and Environmental Science, Southampton, United Kingdom

<sup>5</sup>GloH2O, Almere, the Netherlands

<sup>6</sup>University at Albany, State University of New York, Atmospheric Sciences Research Center, Albany, NY, United States

<sup>7</sup>University of Saskatchewan, Global Institute for Water Security, Saskatchewan, Canada

\*corresponding author(s): Noemi Vergopolan (noemi.v.rocha@gmail.com)

## List of Tables

|           |                                                                                                                                                                          |   |
|-----------|--------------------------------------------------------------------------------------------------------------------------------------------------------------------------|---|
| Table S1: | Summary list of 1,191 in-situ soil moisture observations used in this study. . . . .                                                                                     | 2 |
| Table S2: | Random forest model predictors for $w_{short}$ and $w_{long}$ . Before model training, all the predictors are normalized using their minimum and maximum values. . . . . | 2 |

## List of Figures

|            |                                                                                                                                                                                                                                                                                                                                      |   |
|------------|--------------------------------------------------------------------------------------------------------------------------------------------------------------------------------------------------------------------------------------------------------------------------------------------------------------------------------------|---|
| Figure S1: | Temporal soil moisture evaluation statistics. (a) disaggregated by soil moisture network. (b) SMAP core calibration/validation sites disaggregated per site. The number of sensors for each network/site is shown in Table S1 . . . . .                                                                                              | 3 |
| Figure S2: | Temporal soil moisture evaluation disaggregated by (a) soil texture, (b) elevation, (c) slopes, (d) vegetation type, (e) climatological air temperature, and (d) climatological precipitation temperature using all the 1191 in-situ observations available. The number of sensors in each bin is shown in the middle panel. . . . . | 4 |
| Figure S2: | Continued. . . . .                                                                                                                                                                                                                                                                                                                   | 5 |

**Table S1.** Summary list of 1,191 in-situ soil moisture observations used in this study.

| Type           | Network              | Number of Sensors | Reference                                                             |
|----------------|----------------------|-------------------|-----------------------------------------------------------------------|
| Training (958) | USCRN <sup>+</sup>   | 92                | Bell et al. <sup>1</sup>                                              |
|                | New York Mesonet     | 94                | Brotzge et al. <sup>2</sup>                                           |
|                | Oklahoma Mesonet     | 112               | McPherson et al. <sup>3</sup>                                         |
|                | PBO H2O <sup>+</sup> | 95                | Larson et al. <sup>4</sup>                                            |
|                | SCAN <sup>+</sup>    | 196               | US Department of Agriculture, Natural Resources Conservation Service. |
|                | SNOTEL <sup>+</sup>  | 369               | US Department of Agriculture, Natural Resources Conservation Service  |
| Testing (233)  | Walnut Gulch         | 50                | Keefer et al. <sup>5</sup>                                            |
|                | Little River         | 30                | Bosch et al. <sup>6</sup>                                             |
|                | Little Washita       | 19                | Cosh et al. <sup>7</sup>                                              |
|                | Reynolds Creek       | 14                | Seyfried et al. <sup>8</sup>                                          |
|                | South Fork           | 14                | Coopersmith et al. <sup>9</sup>                                       |
|                | St. Josephs*         | 12                | Colliander et al. <sup>10</sup>                                       |
|                | Tonzi                | 41                | Ma et al. <sup>11</sup>                                               |
|                | TxSON*               | 39                | Colliander et al. <sup>10</sup>                                       |
|                | Fort Cobb*           | 14                | Colliander et al. <sup>10</sup>                                       |

Note: To ensure spatial independent testing samples, we removed observation within 25-km distance from testing samples that did not belong to the SMAP calibration/validation set. \* Datasets referenced in Colliander et al.<sup>10</sup>. <sup>+</sup> Datasets accessed via the International Soil Moisture Network<sup>12</sup>.

**Table S2.** Random forest model predictors for  $w_{short}$  and  $w_{long}$ . Before model training, all the predictors are normalized using their minimum and maximum values.

| Predictor                         | Resolution | Source     | Additional notes                                                            |
|-----------------------------------|------------|------------|-----------------------------------------------------------------------------|
| Latitude                          | —          | —          | —                                                                           |
| Longitude                         | —          | —          | —                                                                           |
| Elevation                         | 30-m       | SRTM       | Danielson and Gesch <sup>13</sup>                                           |
| Slope                             | 30-m       | —          | Computed from the elevation data                                            |
| Soil hydraulic conductivity       | 30-m       | POLARIS    | Chaney et al. <sup>14</sup>                                                 |
| Clay content                      | 30-m       | POLARIS    | Chaney et al. <sup>14</sup>                                                 |
| Brightness temperature            | 30-m       | This study | Climatological HydroBlocks brightness temperature                           |
| Brightness temperature            | 9-km       | SMAP L3E   | Climatological SMAP brightness temperature                                  |
| Albedo                            | 9-km       | SMAP L3E   | Climatological albedo                                                       |
| Vegetation Opacity                | 9-km       | SMAP L3E   | Climatological vegetation opacity                                           |
| Brightness temperature difference | 9-km       | This study | Seasonal difference between SMAP and HydroBlocks and brightness temperature |
| Soil moisture difference          | 9-km       | This study | Seasonal difference between SMAP and HydroBlocks soil moisture              |

**a) Evaluation per network**

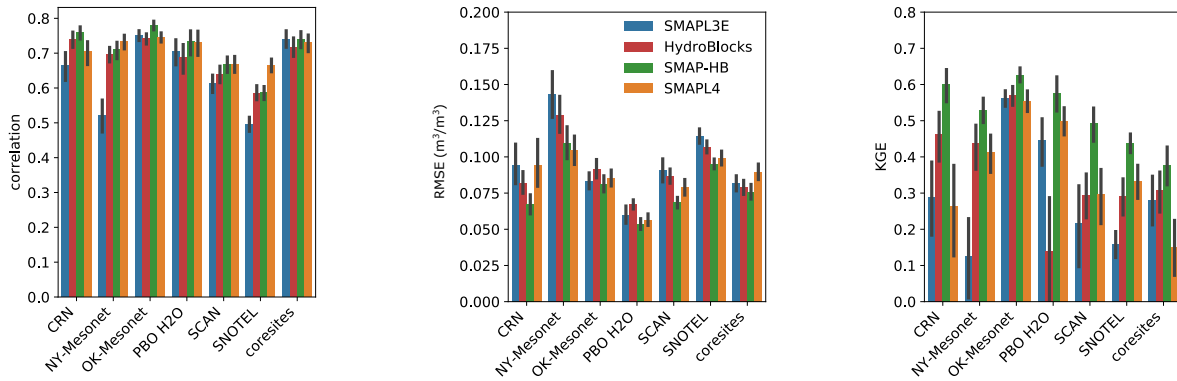

**b) Evaluation per core-site**

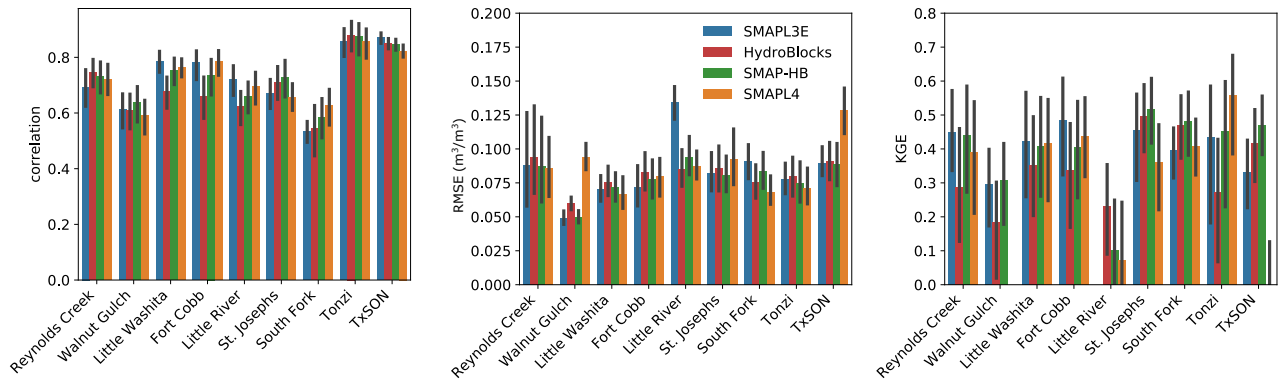

**Figure S1.** Temporal soil moisture evaluation statistics. (a) disaggregated by soil moisture network. (b) SMAP core calibration/validation sites disaggregated per site. The number of sensors for each network/site is shown in Table S1

**a) Soils**

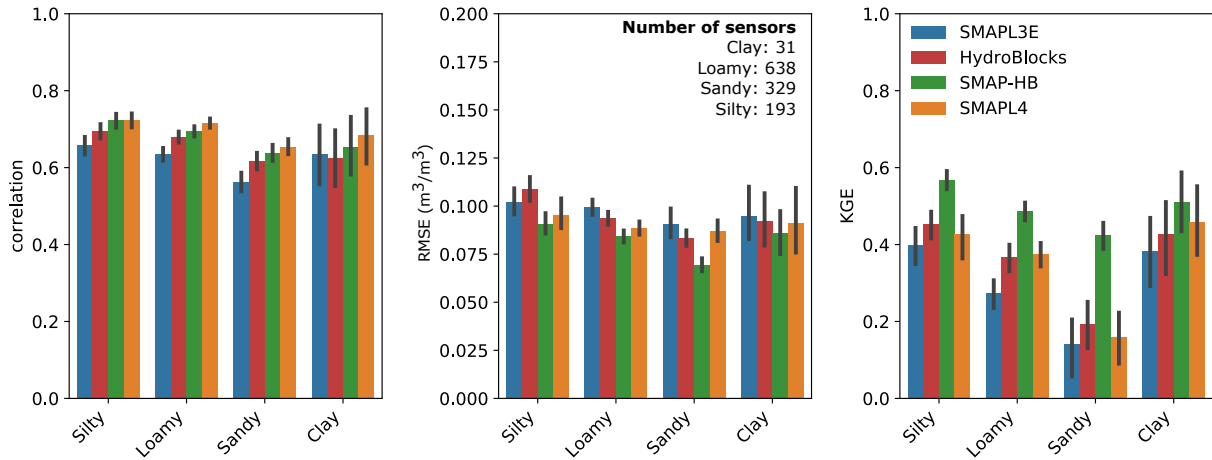

**b) Elevation**

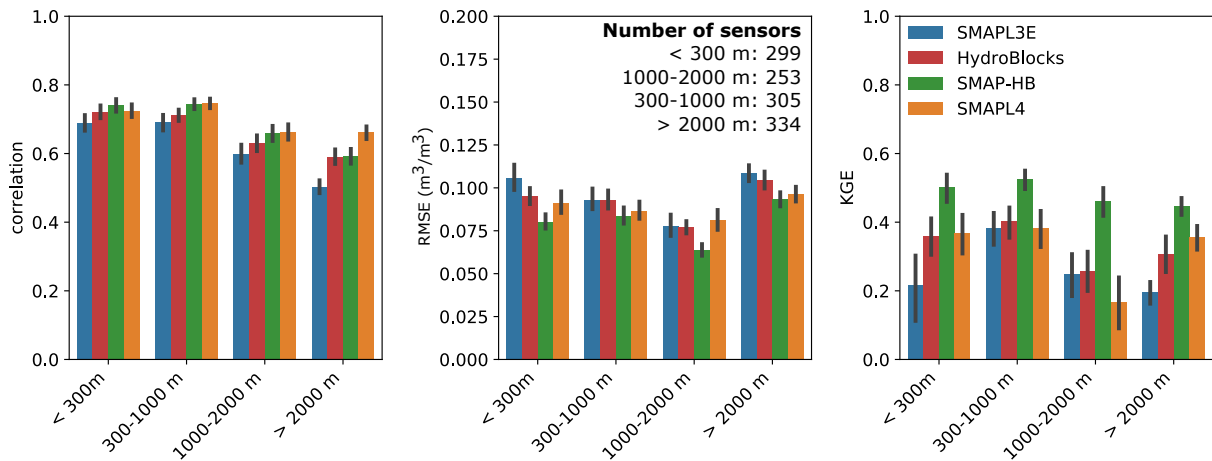

**c) Slopes**

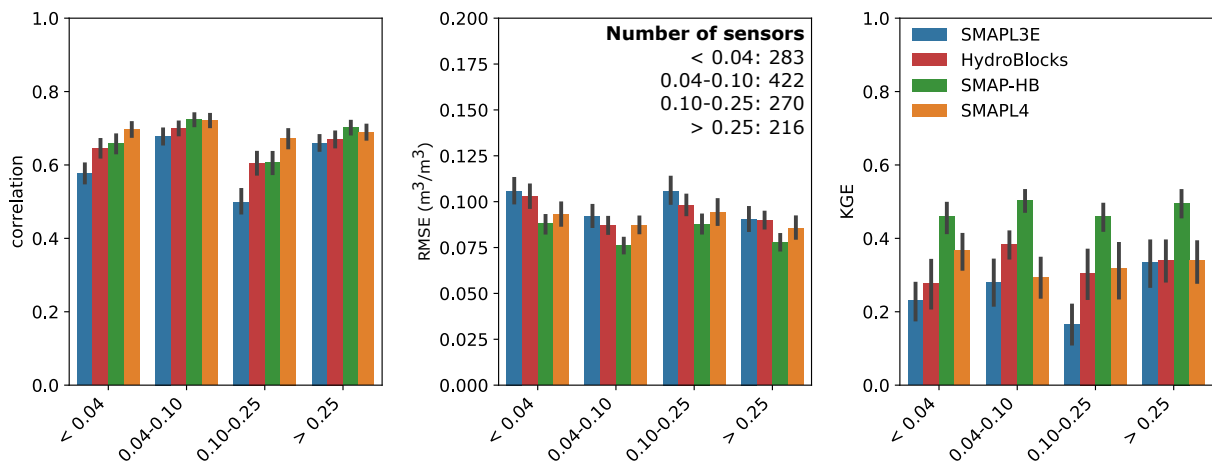

**Figure S2.** Temporal soil moisture evaluation disaggregated by (a) soil texture, (b) elevation, (c) slopes, (d) vegetation type, (e) climatological air temperature, and (d) climatological precipitation temperature using all the 1191 in-situ observations available. The number of sensors in each bin is shown in the middle panel.

**d) Vegetation type**

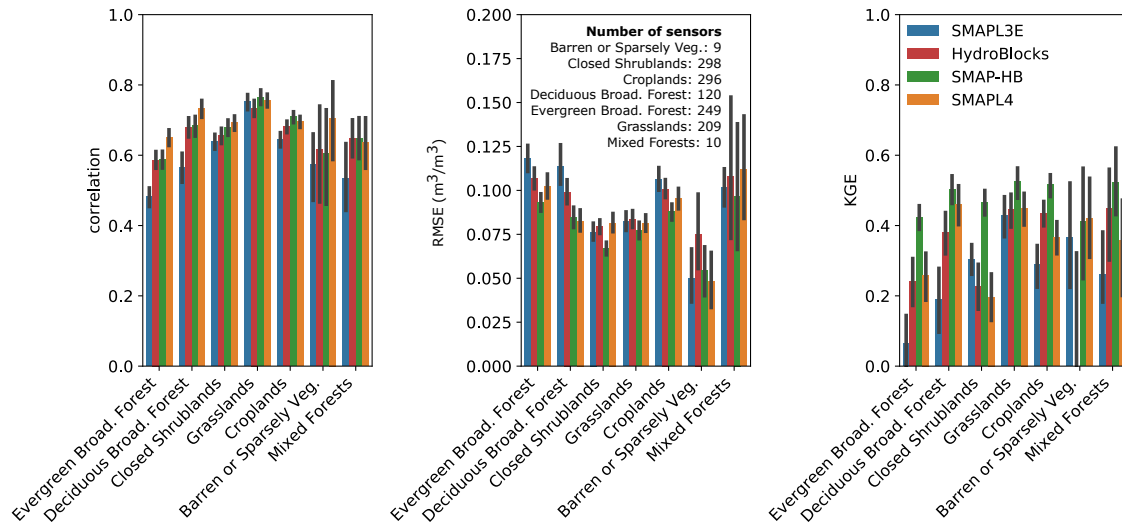

**e) Air temperature climatology**

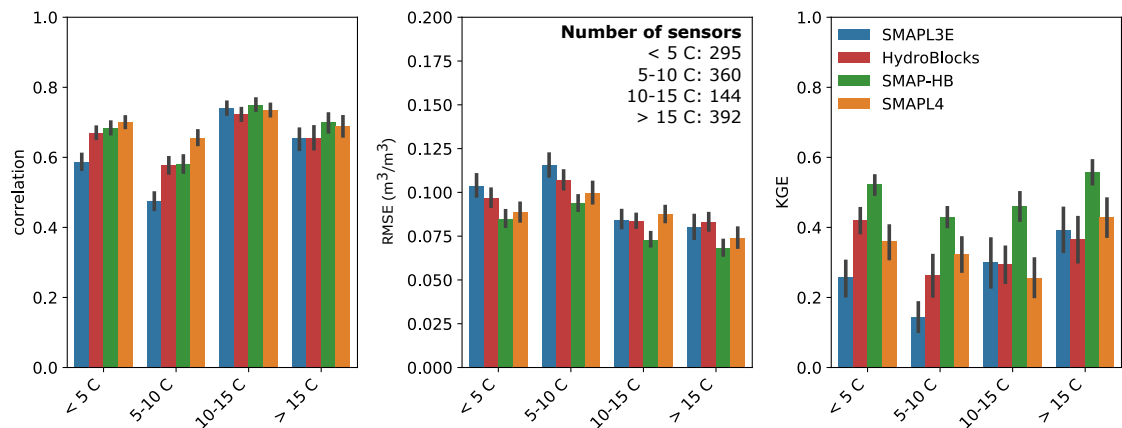

**f) Annual precipitation climatology**

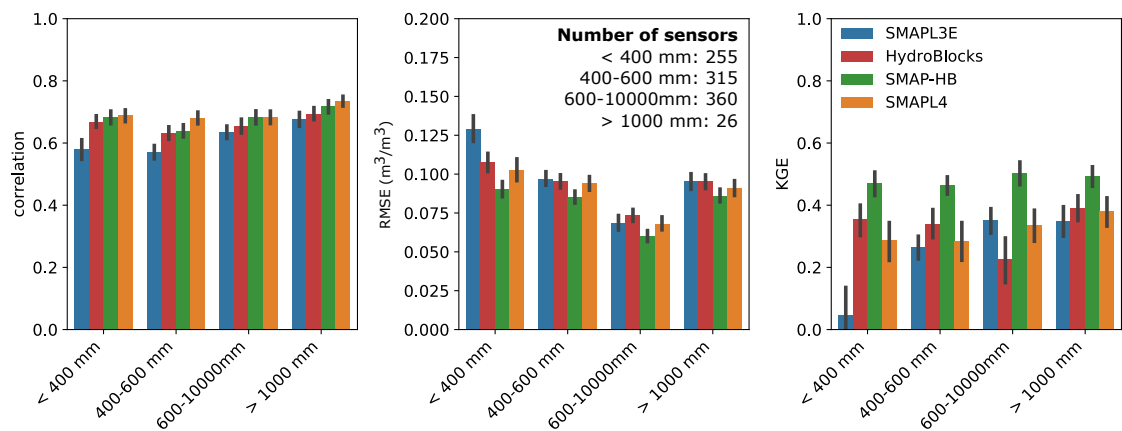

**Figure S2. Continued.**

## References

1. Bell, J. E. *et al.* U.s. climate reference network soil moisture and temperature observations. *J. Hydrometeorol.* **14**, 977–988, <https://doi.org/10.1175/jhm-d-12-0146.1> (2013).
2. Brotzge, J. A. *et al.* A technical overview of the new york state mesonet standard network. *J. Atmospheric Ocean. Technol.* **37**, 1827–1845, <https://doi.org/10.1175/jtech-d-19-0220.1> (2020).
3. McPherson, R. A. *et al.* Statewide monitoring of the mesoscale environment: A technical update on the oklahoma mesonet. *J. Atmospheric Ocean. Technol.* **24**, 301–321, <https://doi.org/10.1175/jtech1976.1> (2007).
4. Larson, K. M. *et al.* Use of gps receivers as a soil moisture network for water cycle studies. *Geophys. Res. Lett.* **35**, <https://doi.org/10.1029/2008gl036013> (2008).
5. Keefer, T. O., Moran, M. S. & Paige, G. B. Long-term meteorological and soil hydrology database, walnut gulch experimental watershed, arizona, united states. *Water Resour. Res.* **44**, <https://doi.org/10.1029/2006wr005702> (2008).
6. Bosch, D. D. *et al.* Little river experimental watershed database. *Water Resour. Res.* **43**, <https://doi.org/10.1029/2006wr005844> (2007).
7. Cosh, M. H., Jackson, T. J., Starks, P. & Heathman, G. Temporal stability of surface soil moisture in the little washita river watershed and its applications in satellite soil moisture product validation. *J. Hydrol.* **323**, 168–177, <https://doi.org/10.1016/j.jhydrol.2005.08.020> (2006).
8. Seyfried, M. S., Murdock, M. D., Hanson, C. L., Flerchinger, G. N. & Van Vactor, S. Long-term soil water content database, reynolds creek experimental watershed, idaho, united states. *Water Resour. Res.* **37**, 2847–2851, <https://doi.org/10.1029/2001wr000419> (2001).
9. Coopersmith, E. J., Cosh, M. H., Petersen, W. A., Prueger, J. & Niemeier, J. J. Soil moisture model calibration and validation: An ars watershed on the south fork iowa river. *J. Hydrometeorol.* **16**, 1087–1101, <https://doi.org/10.1175/jhm-d-14-0145.1> (2015).
10. Colliander, A. *et al.* Validation of smap surface soil moisture products with core validation sites. *Remote. Sens. Environ.* **191**, 215–231, <https://doi.org/10.1016/j.rse.2017.01.021> (2017).
11. Ma, S., Baldocchi, D., Wolf, S. & Verfaillie, J. Slow ecosystem responses conditionally regulate annual carbon balance over 15 years in californian oak-grass savanna. *Agric. For. Meteorol.* **228–229**, 252–264, <https://doi.org/10.1016/j.agrformet.2016.07.016> (2016).
12. Dorigo, W. A. *et al.* The international soil moisture network: a data hosting facility for global in situ soil moisture measurements. *Hydrol. Earth Syst. Sci.* **15**, 1675–1698, <https://doi.org/10.5194/hess-15-1675-2011> (2011).
13. Danielson, J. J. & Gesch, D. B. *Global multi-resolution terrain elevation data 2010 (GMTED2010)* (US Department of the Interior, US Geological Survey, 2011).
14. Chaney, N. W. *et al.* Polaris soil properties: 30-m probabilistic maps of soil properties over the contiguous united states. *Water Resour. Res.* **55**, 2916–2938, <https://doi.org/10.1029/2018wr022797> (2019).
